# Supplementary material for: Predicting medical usage rate at mass gathering events in Belgium: development and validation of a nonlinear multivariable regression model
Source: BMC Public Health. 2022 Jan 25;22:173. doi: 10.1186/s12889-022-12580-8 (PMC8789208; doi:10.1186/s12889-022-12580-8)
Supplement: Supplementary file 4 — Additional file 4. [file 12889_2022_12580_MOESM4_ESM.docx]

## Supporting Information A3. Adjusting prediction of PPR for temperature.

### Methods

The association between the maximal daily temperature (Tmax) and PPR was investigated by linear regression analysis with data from the outdoor music festival Rock Werchter (36 datapoints), resulting in the following regression equation:

(1)

with PPRTmax the PPR in function of Tmax, a the intercept and bTmax the slope. This was rewritten as

(2)

with PPRRTRW the PPR estimated by the regression tree for Rock Werchter and TmaxRW the Tmax for which PPRTmax = PPRRTRW by cancelling out the second term of the equation. Finally, the equation was further generalised for other manifestations than Rock Werchter:

(3)

with PPRRTi the PPR estimated by the regression tree for event i. The factor PPRRTi/PPRRTRW adjusts the slope bTmax proportionally to event i’s predicted PPRRTi, compared to the PPRRTRW predicted for Rock Werchter.

Analogously, PPRTav was estimated as follows:

(4)

### Results

We found a strong linear association of both Tav and Tmax with PPR at the Rock Werchter festival. Introducing a quadratic or cubic term in each analysis revealed clearly non-significant associations. For Tmax, the equivalent for equation (1) was

(5)

with N = 36; p<0.0001; R² = 0.53. The regression tree predicted a PPR of 183/10,000 for Rock Werchter (terminal node 5 in Fig 1), corresponding with a Tmax of 25.6°C in equation (5). Hence, it was rewritten as

(6)

for predicted PPR at Rock Werchter, or as

(7)

for any MG i that has a PPR predicted by the regression tree (PPRRTi). This way, the predicted PPR was adjusted with a term proportional to itself and to the difference between Tmax and 25.6°C .

Analogously, for Tav, the regression equation was

(8)

for Rock Werchter, and

(9)

for any MG i.
